# Supplementary material for: Human variation impacting MCOLN2 restricts Salmonella Typhi replication by magnesium deprivation
Source: PubMed Central journal article supplement (PMC10203047; doi:10.1016/j.xgen.2023.100290), 2023-04-04
Supplement: mmc1.pdf [file mmc1.pdf]

Cell Genomics, Volume 3

## Supplemental information

### Human variation impacting

***MCOLN2* restricts *Salmonella* Typhi**

**replication by magnesium deprivation**

**Kyle D. Gibbs, Liuyang Wang, Zhuo Yang, Caroline E. Anderson, Jeffrey S. Bourgeois, Yanlu Cao, Margaret R. Gaggioli, Martin Biel, Rosa Puertollano, Cheng-Chang Chen, and Dennis C. Ko**

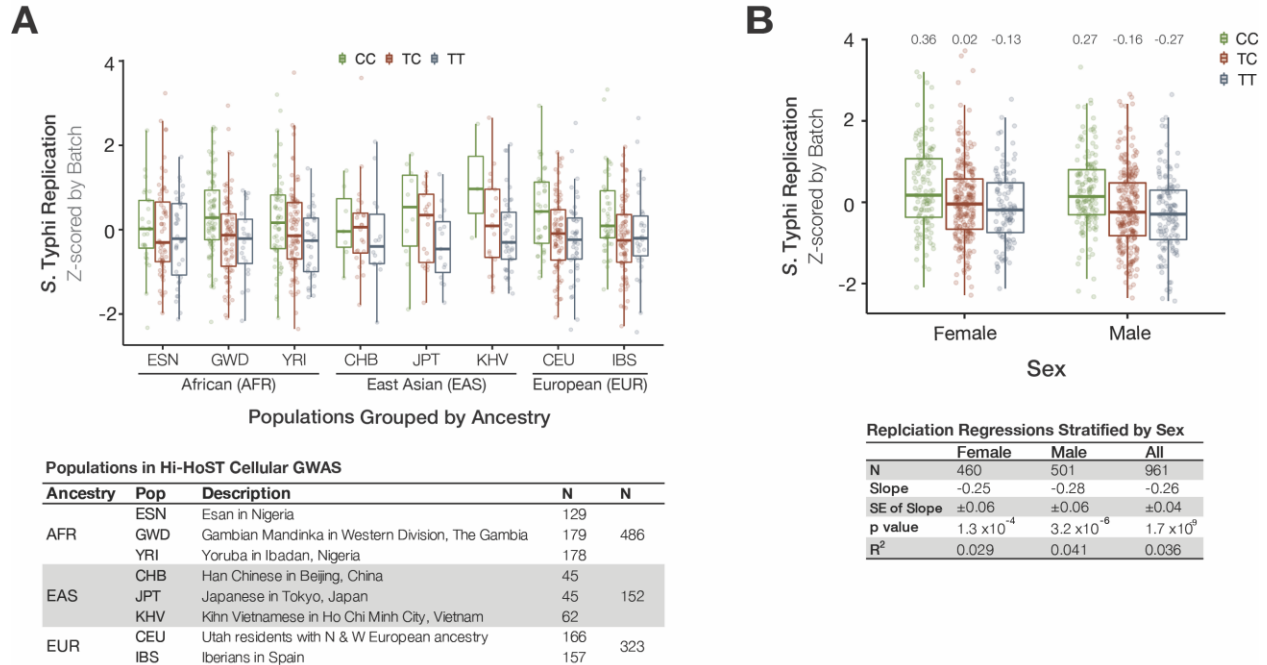

**Figure S1. The rs10873679 C-allele associates with more *S. Typhi* replication across all sampled populations and in both sexes, related to Figure 1. (A) Increased z-scored *S. Typhi* replication associated with the C-allele in all populations. Individual population regressions slopes range from -0.12 in ESN to -0.40 in GWD. Table below lists number of LCLs from each population used in cellular GWAS. (B) The rs10873679 C-allele associated with more z-scored *S. Typhi* replication in both sexes. Linear regressions are listed in the table. A two-way ANOVA with genotype and sex finds no significant interaction between sex & *MCOLN2* genotype ( $p = 0.8$ ) despite both individual factors being a significant source of variation (genotype  $p=1.9 \times 10^{-9}$  & sex  $p=0.02$ ).**

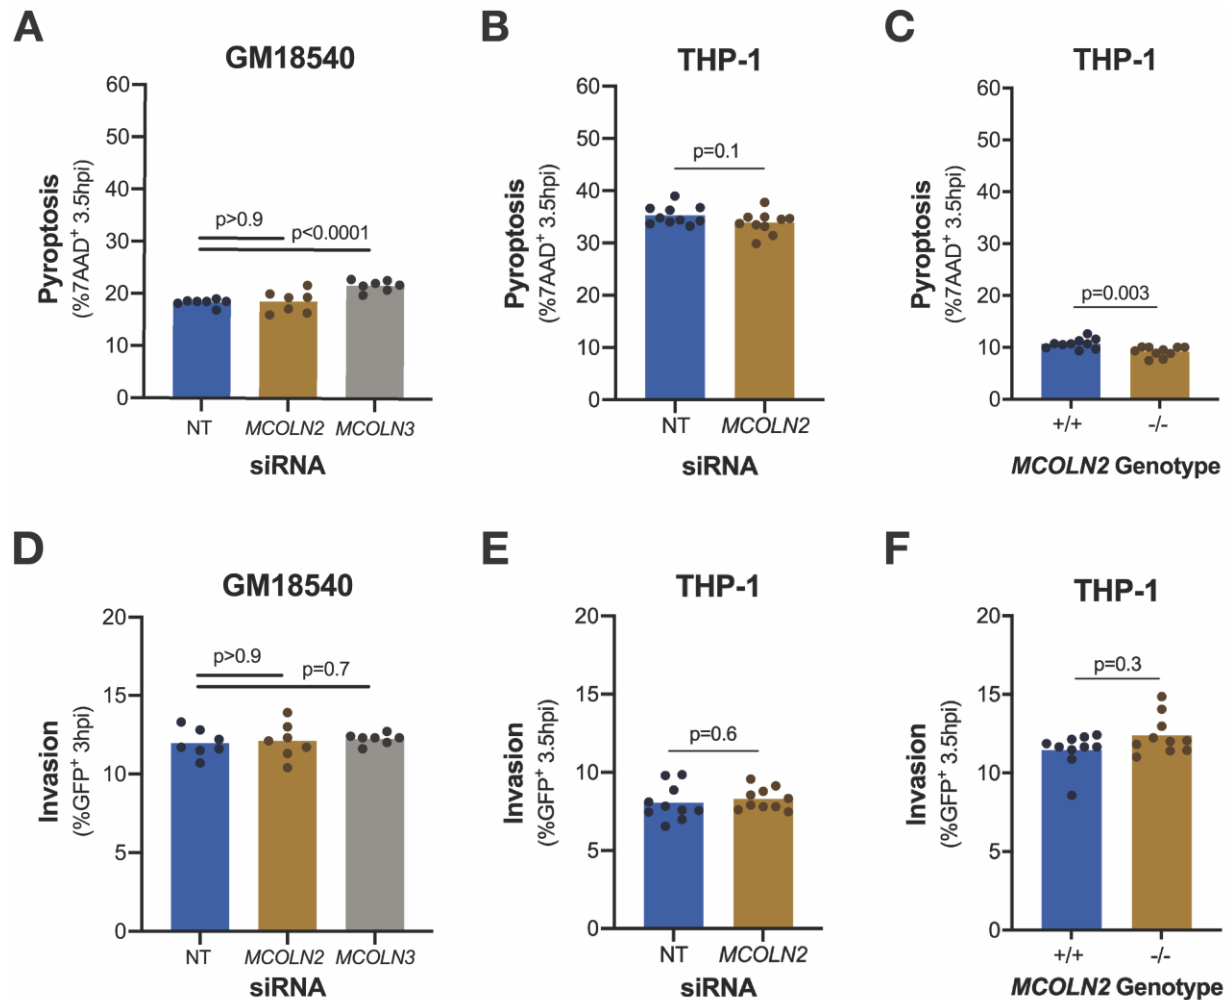

**Figure S2. Neither *MCOLN2* knockdown nor knockout affect pyroptosis or invasion during *S. Typhi* infection in Figure 2E-G.** (A–C) Pyroptosis is the percent of cells dead (7AAD<sup>+</sup>) at 3.5 hpi. (D–E) Invasion is the percent of living (7AAD<sup>-</sup>) and infected (GFP<sup>+</sup>) cells at 3.5 hpi. LCL (GM18540) infection in A & D are nine replicates from three experiments from Figure 2E. THP-1 infection in B, C, E, & F are ten replicates from two experiments presented in Figure 2F & G. In A & F, the p values are from Mann-Whitney U tests. In B-E, p values are from unpaired *t* tests. While wild-type and knockout cells significantly differ in C, the effect size is only 0.5% respectively.

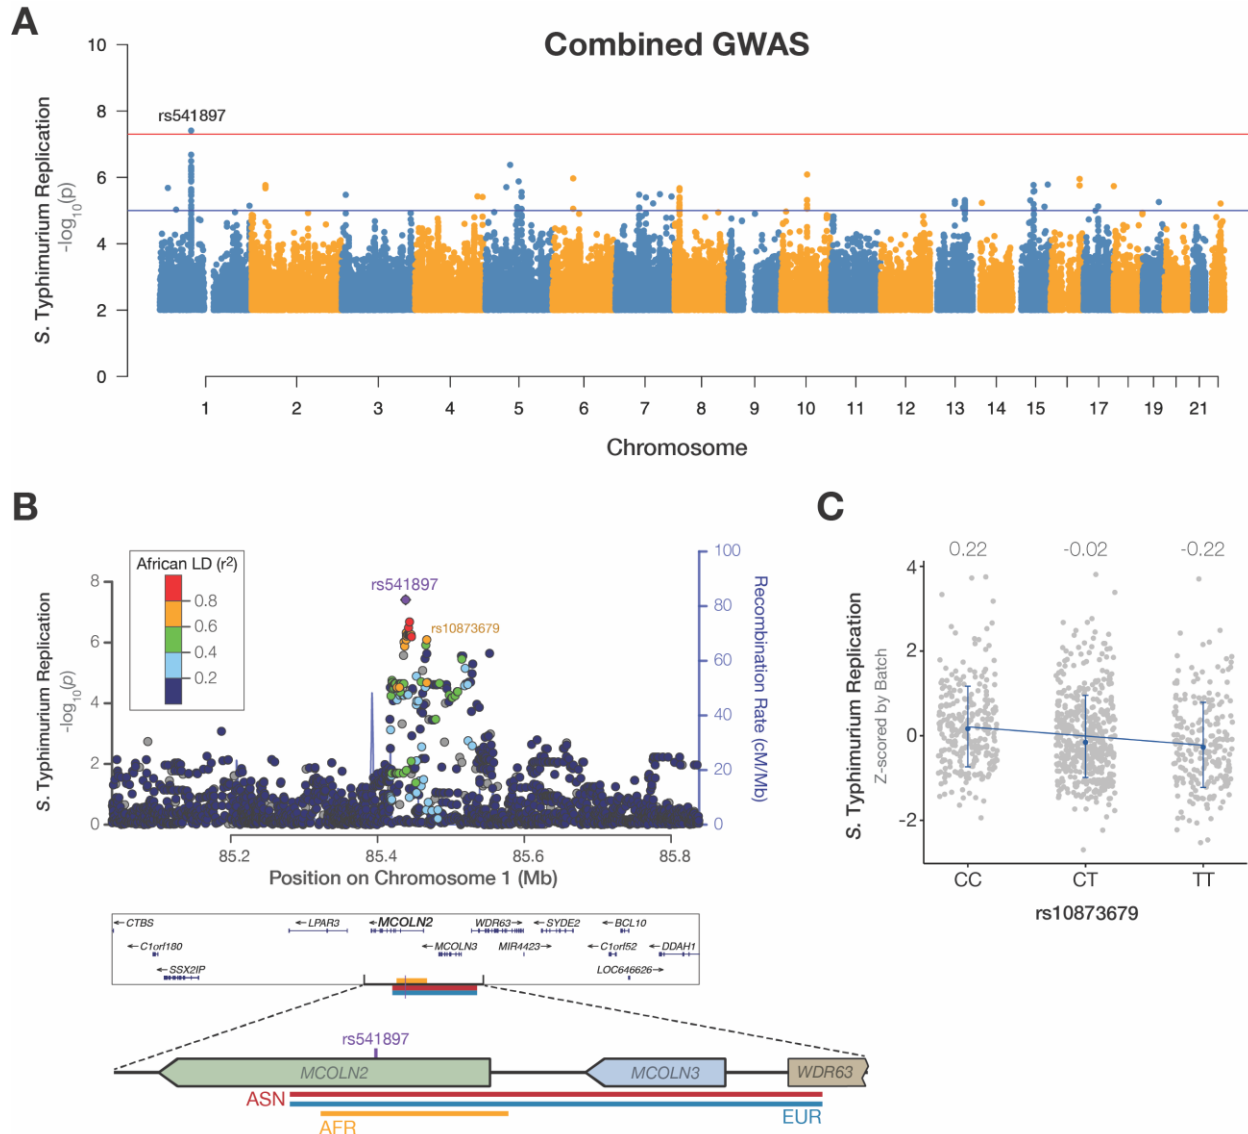

**Figure S3. Increased *S. Typhimurium* replication also associates with the rs10873679 C- allele, related to Figure 2H.** (A) The rs541897 locus association with z-scored *S. Typhimurium* replication ( $p = 3.9 \times 10^{-8}$ ) passes genome-wide significance threshold ( $5 \times 10^{-8}$ ; red line). (B) A local Manhattan plot of the *S. Typhimurium* replication-associated locus on chromosome 1 (hg19 build) shows that the *S. Typhimurium* lead SNP, rs541897, is in the same locus as the *S. Typhi* lead SNP, rs10873679. The *S. Typhi* and *S. Typhimurium* lead SNPs are linked (LD  $r^2 = 0.71$  in African ancestry populations). Dots for each SNP are color coded by African (AFR) linkage disequilibrium (LD;  $r^2$ ) from 1000 genomes Nov 2014 release. A 164 kb zoom in on the *MCOLN2/3* region indicates regions well-linked ( $r^2 > 0.6$ ) with rs541897 by continental ancestry: African with a 41 kb orange bar, European (EUR) with a 116 kb blue bar, & Asian (ASN) with a 116 kb red bar. (C) The rs10873679 C-allele associates with more *S. Typhimurium* replication. The slope of a linear regression predicting replication from genotype is significantly different from zero ( $\beta = -0.22 \pm 0.04$ ;  $p = 3.5 \times 10^{-6}$ ). Mean replication of each genotype is listed above their respective dot plot. Bars are mean  $\pm$  SD.

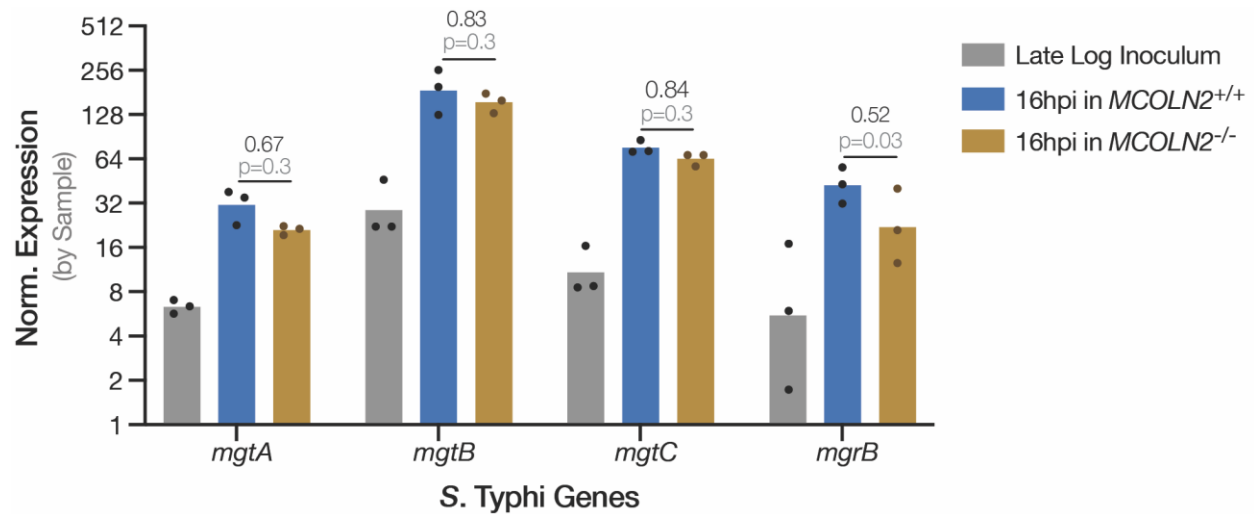

**Figure S4. The increased expression of  $Mg^{2+}$ -regulated *S. Typhi* genes inside THP-1 monocytes is consistently decreased in *MCOLN2* knockouts, same data underlying  $\log_2$ [Fold Change] in Figure 3D.** Three replicates are from three experiments. Bars are geometric mean. Inoculum RNA was mixed with RNA from uninfected THP-1 cells of each genotype, so each late log replicate is the average of two technical (sequencing) replicates. Ratios (black text) are geometric mean from expression of bacteria replicating inside *MCOLN2* knockout over bacteria replicating in wild-type THP-1 cells. P values (grey) are from paired t tests corrected for multiple testing by Holm-Šidák method.

**Table S3.** *Salmonella enterica* ser. Typhi strain Ty2 gene sets used in GSEA. Related to Figures 3C and 3D.

| Gene Sets           | N  | Genes                                                                                                                          |
|---------------------|----|--------------------------------------------------------------------------------------------------------------------------------|
| Housekeeping        | 9  | <i>rpoD aroC dnaN hemD hisD sucA thrA dnaK rpoA</i>                                                                            |
| SPI-1               | 24 | <i>sicP sptP iacP prgH invA sigE invF spaM prgl invF sipA sipB sipC sipD spaS spaR spaP spaO hilA hilD spaK spaJ spaI spaH</i> |
| SPI-2               | 23 | <i>spiC spiA ssaD ssaE sseA sseB sscA sseC sseD sseE sscB sseF sseG ssaG ssal ssaJ ssaK ssaL ssaR ssaR ssaS ssaT ssaU</i>      |
| PhoP Regulon        | 19 | <i>pmrD mgtA phoN phoP phoQ mgtB virK ybjX mgrB pagP pagD iraP pagC mgtC pipD pagK ugtL pgtE spiC</i>                          |
| Magnesium Influx    | 4  | <i>mgtA mgtB mgtS mgrB</i>                                                                                                     |
| PmrA Regulon        | 11 | <i>pmrC pmrA pmrB naxD arnB arnC arnA arnD arnT arnE arnF</i>                                                                  |
| Zinc Efflux         | 4  | <i>fieF zntA zntB zntB</i>                                                                                                     |
| Zinc Influx         | 4  | <i>zupT znuA znuB znuC</i>                                                                                                     |
| Ferrous Iron Efflux | 2  | <i>fieF iceT</i>                                                                                                               |
| Ferrous Iron Influx | 3  | <i>feoA feoB feoC</i>                                                                                                          |
| Manganese Influx    | 7  | <i>mntH sitA sitB sitC sitD mntR mntS</i>                                                                                      |
| Copper Response     | 8  | <i>copA cueR cueO cueP scsA scsB scsC scsD</i>                                                                                 |
| MFS Efflux          | 5  | <i>mdtH mdtM mdtG emrD mdfA</i>                                                                                                |
| ToiC Efflux         | 5  | <i>macB tolC acrA acrE marA</i>                                                                                                |
| RpoE Regulon        | 5  | <i>rpoE rseA rseB rseC</i>                                                                                                     |

**Table S4.** Oligonucleotides grouped by function in study. Related to STAR Methods.

| <b>Lambda-Red Recombination</b> |                 |                     |                                                                    |                                                                  |
|---------------------------------|-----------------|---------------------|--------------------------------------------------------------------|------------------------------------------------------------------|
| Target Gene                     | Gene ID         | Primer Designations | Fwd for Kan <sup>R</sup> Cassette Generation                       | Rvr for Kan <sup>R</sup> Cassette Generation                     |
| <i>mgtA</i>                     | t4491           | DK972 & DK973       | TATAATCCGCGGCGCAATTATTTACTTACCGGAGGCGAC<br>gtgtaggctggagctgcttc    | TCGGGGATTAAGCACGCTGGCGAATCCCGACGAAAGTGT<br>catatgaatatcctccttag  |
| <i>mgtB</i>                     | t3755           | DK974 & DK975       | ATATGCAGGAAACACTACACCTTAATTTGGGGATTCATC<br>gtgtaggctggagctgcttc    | TATCGGGTGAGCGATTTCATCTGGGGATCCTCAAACATTA<br>catatgaatatcctccttag |
| <i>ssaT</i>                     | t1289           | DK3 & DK433         | taccocggcagataatgttaacgaattggagagcatggttga<br>gtgtaggctggagctgcttc | TCACGTAATTTCTTTCTGTAGGCTGTCTGTTTTCTCGC<br>catatgaatatcctccttag   |
| <b>Deletion Confirmation</b>    |                 |                     |                                                                    |                                                                  |
| Target Gene(s)                  | Gene ID         | Primer Designations | Fwd                                                                | Rvr                                                              |
| <i>phoPQ</i>                    | t1689 & t1690   | DK1008 & DK1009     | CATGACGCCGCAAAATTATATC                                             | GAAAGTCGGCCAGTTAAGA                                              |
| <i>ssaT</i>                     | t1289           | DK434 & DK435       | CGGTAGTTGGTGTCACTCGTAAG                                            | AGCGCAATCAGCTGAAATAATG                                           |
| <i>mgtA</i>                     | t4491           | DK980 & DK981       | CGTGACGCTGATGGTGATAAA                                              | ACATCTCCTCCTCTCGTTCTG                                            |
| <i>mgtB</i>                     | t3755           | DK982 & DK983       | CAGGCGTATAAGGAGGGAATG                                              | ACACCAACAGGCTAATCAGTAA                                           |
| <i>MCOLN2</i>                   | ENSG00000153898 | DK859 & DK860       | CTGGGGTAATTTCCAAAAGCAGT                                            | AGGTTATTCTTCTGTGGACTTGT                                          |
| <b>SYBR RT-qPCR</b>             |                 |                     |                                                                    |                                                                  |
| Target Gene(s)                  | Gene ID         | Primer Designations | Fwd                                                                | Rvr                                                              |
| <i>ACTB</i>                     | ENSG00000075624 | DK880 & DK881       | CCTGTACGCCAACACAGTGC                                               | ATACTCTGCTTGCTGATCC                                              |
| <i>rpoD</i>                     | t3131           | DK628 & DK629       | GAAATGGCACTGTTGAAC TG                                              | CAGATAGGTAATGGCTTCCGG                                            |
